# Supplementary material for: Metabolomic Profiling of Mice with Tacrolimus-Induced Nephrotoxicity: Carnitine Deficiency in Renal Tissue
Source: MDPI journal article supplement (doi:10.3390/biomedicines12030521), 2024-02-26
Supplement: s1 [file s1]

## Supplementary information for

# Metabolomic Profiling of Mice with Tacrolimus-Induced Nephrotoxicity: Carnitine Deficiency in Renal Tissue

Sho Nishida <sup>1,2</sup>, Tamaki Ishima <sup>1</sup>, Natsuka Kimura <sup>1</sup>, Daiki Iwami <sup>2</sup>, Ryoze Nagai <sup>3</sup>, Yasushi Imai <sup>1</sup> and Kenichi Aizawa <sup>1,4,5,\*</sup>

<sup>1</sup> Division of Clinical Pharmacology, Department of Pharmacology, Jichi Medical University; Tochigi, Japan

<sup>2</sup> Division of Renal Surgery and Transplantation, Department of Urology, Jichi Medical University

<sup>3</sup> Jichi Medical University, Tochigi, Japan; rnagai@jichi.ac.jp

<sup>4</sup> Clinical Pharmacology Center, Jichi Medical University Hospital, Tochigi, Japan

<sup>5</sup> Division of Translational Research, Clinical Research Center, Jichi Medical University Hospital, Tochigi, Japan

\* Correspondence: aizawa@jichi.ac.jp ; Tel.: +81(0)285-58-7388

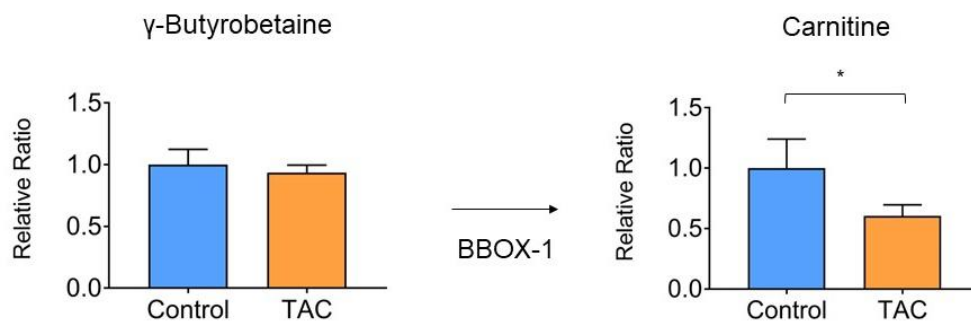

**Supplemental Figure S1. Relationship between  $\gamma$ -butyrobetaine and carnitine.** Solid line indicates the relationship between the substance and the produced metabolite. Carnitine is biosynthesized from  $\gamma$ -butyrobetaine via Gamma-butyrobetainenhydroxylase 1 (BBOX-1). The relative ratio of  $\gamma$ -butyrobetaine was 0.9 in the Tac group compared with the control group.  $\gamma$ -butyrobetaine was not significantly different between the two groups ( $p = 0.37$ ).
